# Supplementary material for: Design, Synthesis and Antimicrobial Potential of Conjugated Metallopeptides Targeting DNA
Source: MDPI journal article supplement (doi:10.3390/scipharm92020021), 2024-04-17
Supplement: s1 [file s1]

# Design, Synthesis and Antimicrobial Potential of Conjugated Metallopeptides Targeting DNA

Maria Camila Moreno-Ramirez<sup>1</sup>, Adriana Stefania Arias-Bravo<sup>1</sup>, Alberto Aragón-Muriel<sup>1,2</sup>, César Alonso Godoy<sup>3</sup>, Yamil Liscano<sup>4</sup>, Jose Oñate Garzón<sup>5</sup>\*, Dorian Polo-Cerón<sup>1</sup> \*

- 1 Laboratorio de Investigación en Catálisis y Procesos (LICAP), Departamento de Química, Facultad de Ciencias Naturales y Exactas, Universidad del Valle, Cali 76001, Colombia.
- 2 Grupo de Investigaciones Bioquímicas (GIB), Universidad del Magdalena, Santa Marta 470004, Colombia.
- 3 Laboratorio de Investigación en Biocatálisis y Biotransformaciones (LIBB), Grupo de Investigación en Ingeniería de los Procesos Agroalimentarios y Biotecnológicos (GIPAB), Departamento de Química, Facultad de Ciencias Naturales y Exactas, Universidad del Valle, Cali 76001, Colombia
- 4 Grupo de Investigación en Salud Integral (GSI), Departamento Facultad de Salud, Universidad Santiago de Cali, Cali 760035, Colombia.
- 5 Grupo de Investigación en Química y Biotecnología (QUIBIO), Facultad de Ciencias Básicas, Universidad Santiago de Cali, Cali 760035, Colombia.

\* Correspondence: [jose.onate00@usc.edu.co](mailto:jose.onate00@usc.edu.co); [dorian.polo@correounivalle.edu.co](mailto:dorian.polo@correounivalle.edu.co)

## 1. FT-IR spectra data

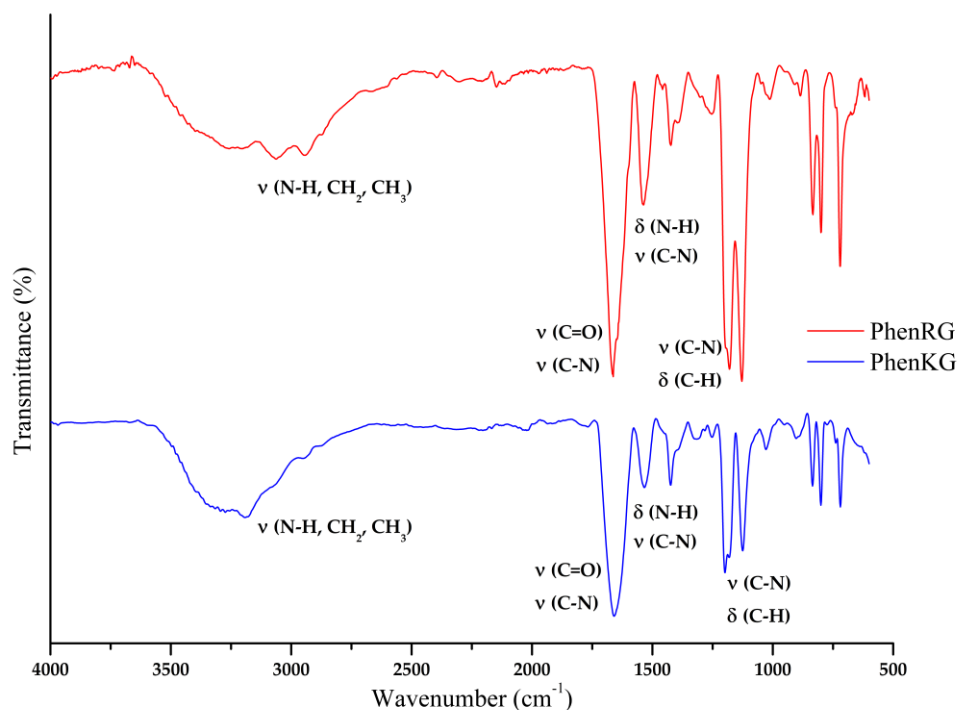

**Figure S1.** FT-IR spectra of the modified dipeptides (PhenRG; PhenKG)

## 2. NMR spectral data

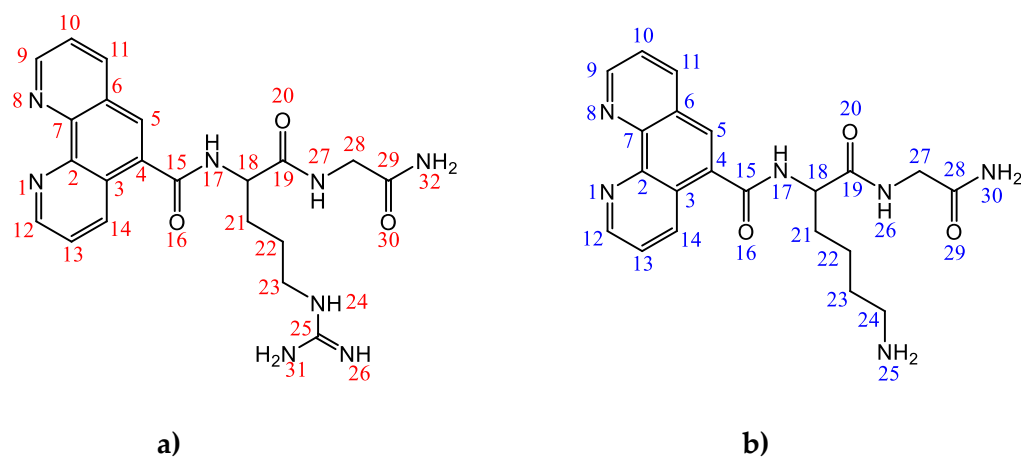

**Figure S2.** a). Structure of 5-carboxy-1,10-phenanthroline, arginine, glycine (PhenRG), a). Structure of 5-carboxy-1,10-phenanthroline, lysine, glycine (PhenKG).

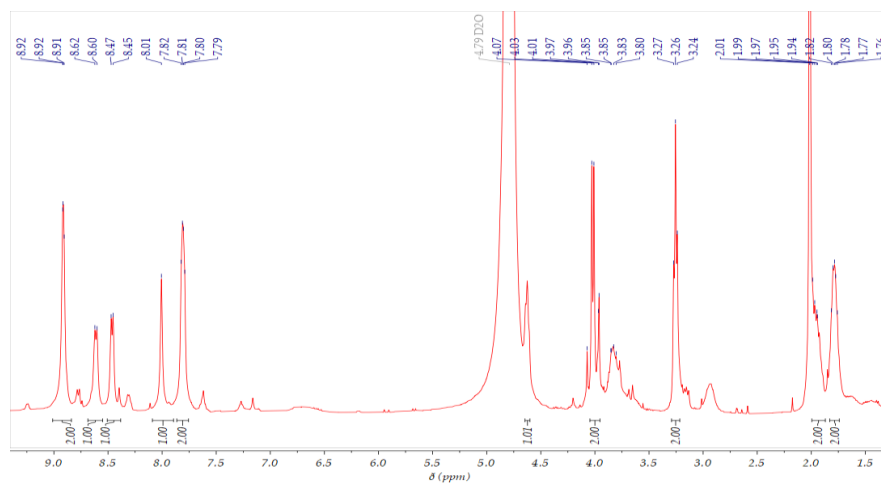

**Figure S3.** NMR-<sup>1</sup>H spectra of PhenRG

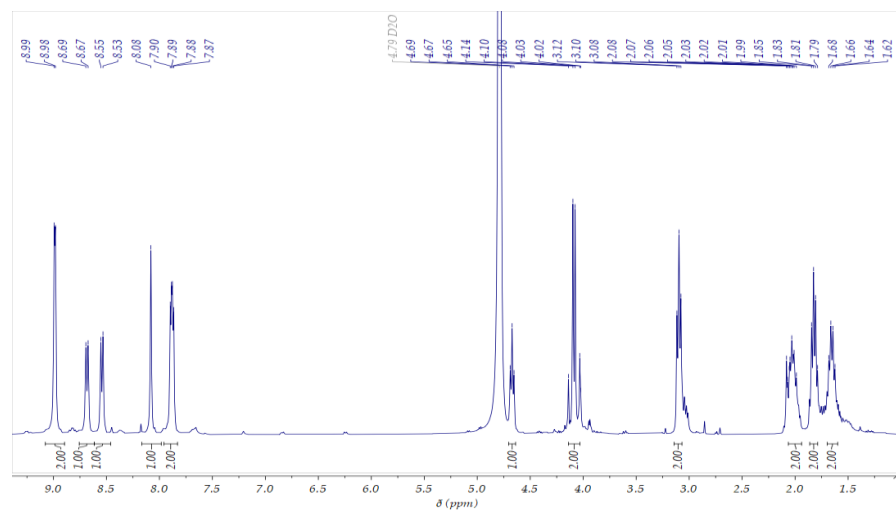

**Figure S4.** NMR-<sup>1</sup>H spectra of PhenKG

### 3. Mass spectral data

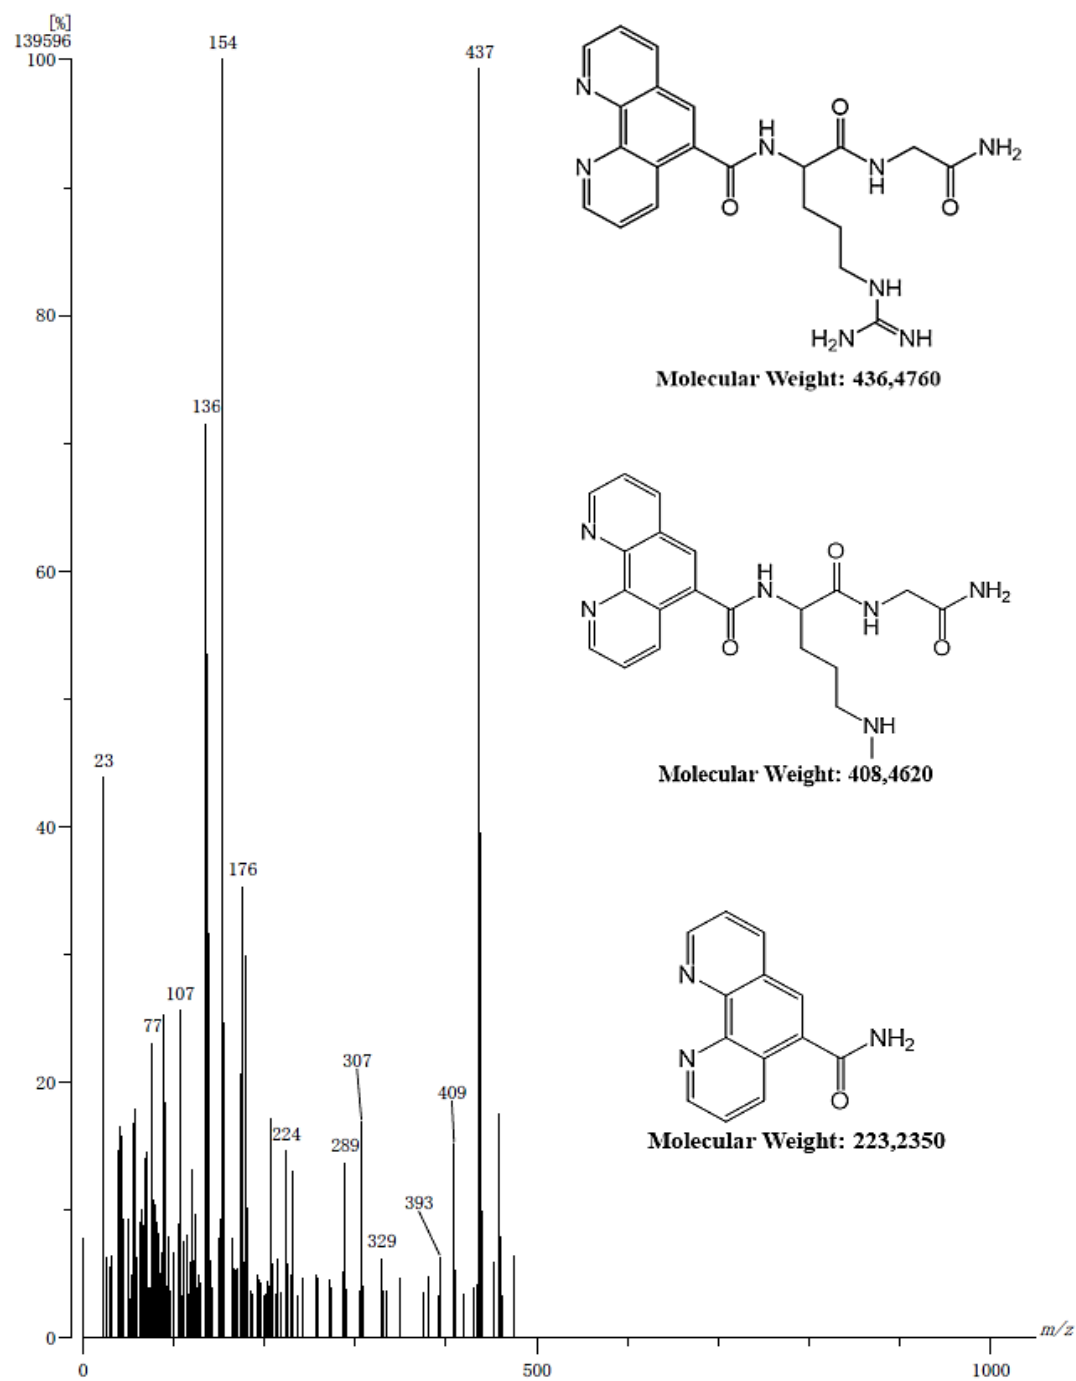

**Figure S5.** Mass spectra with ionization by FAB+ for PhenRG.

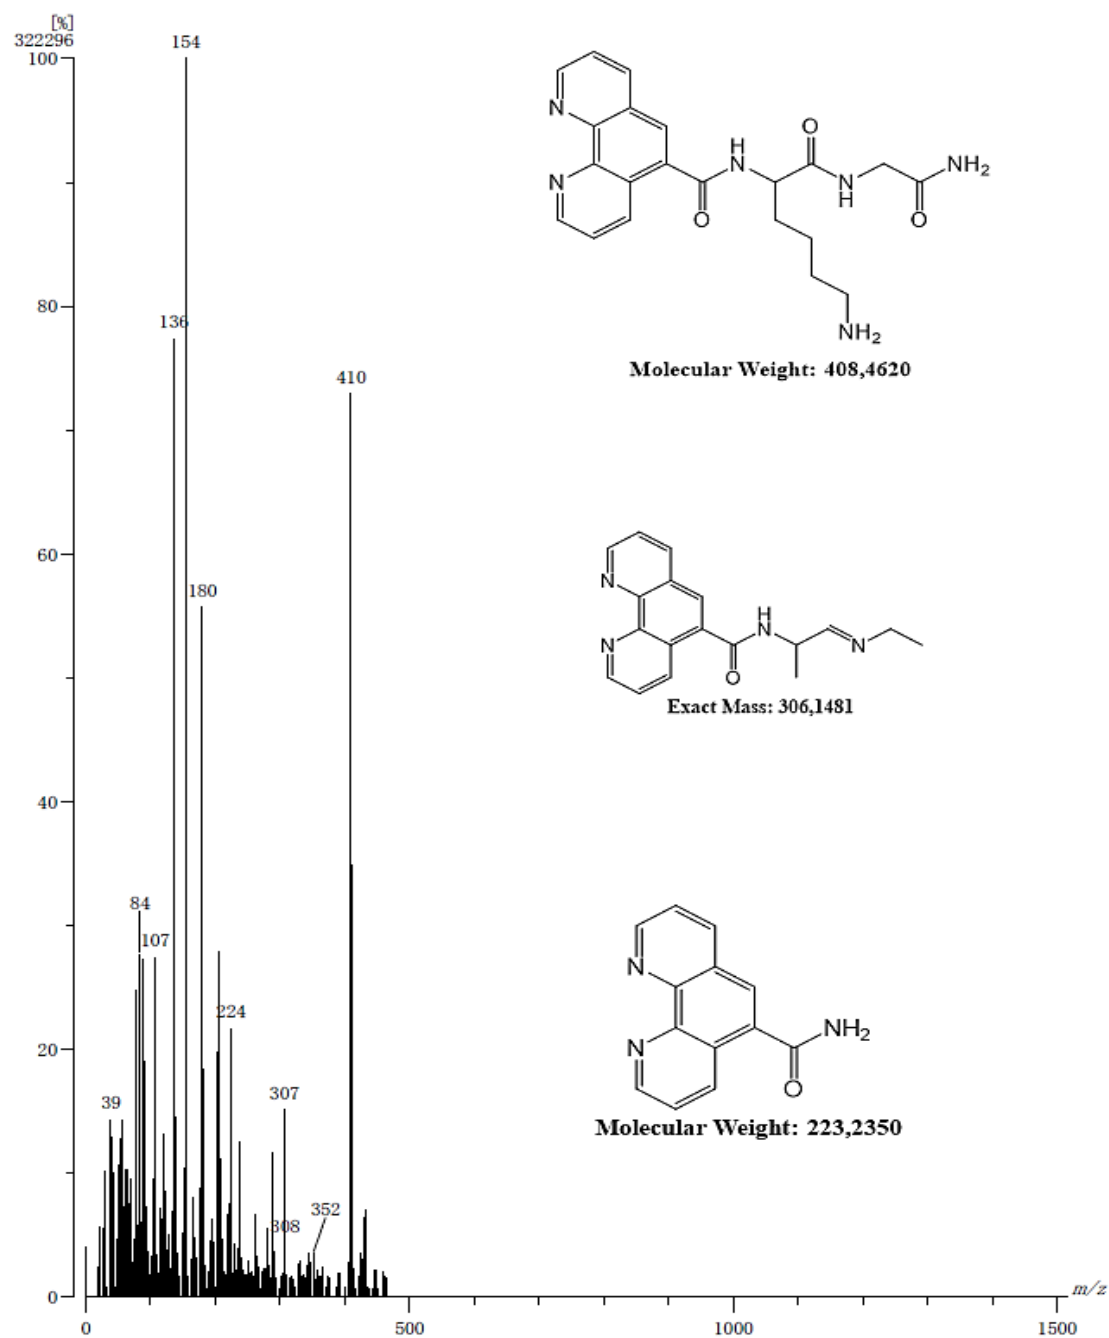

**Figure S6.** Mass spectra with ionization by FAB+ for PhenKG.

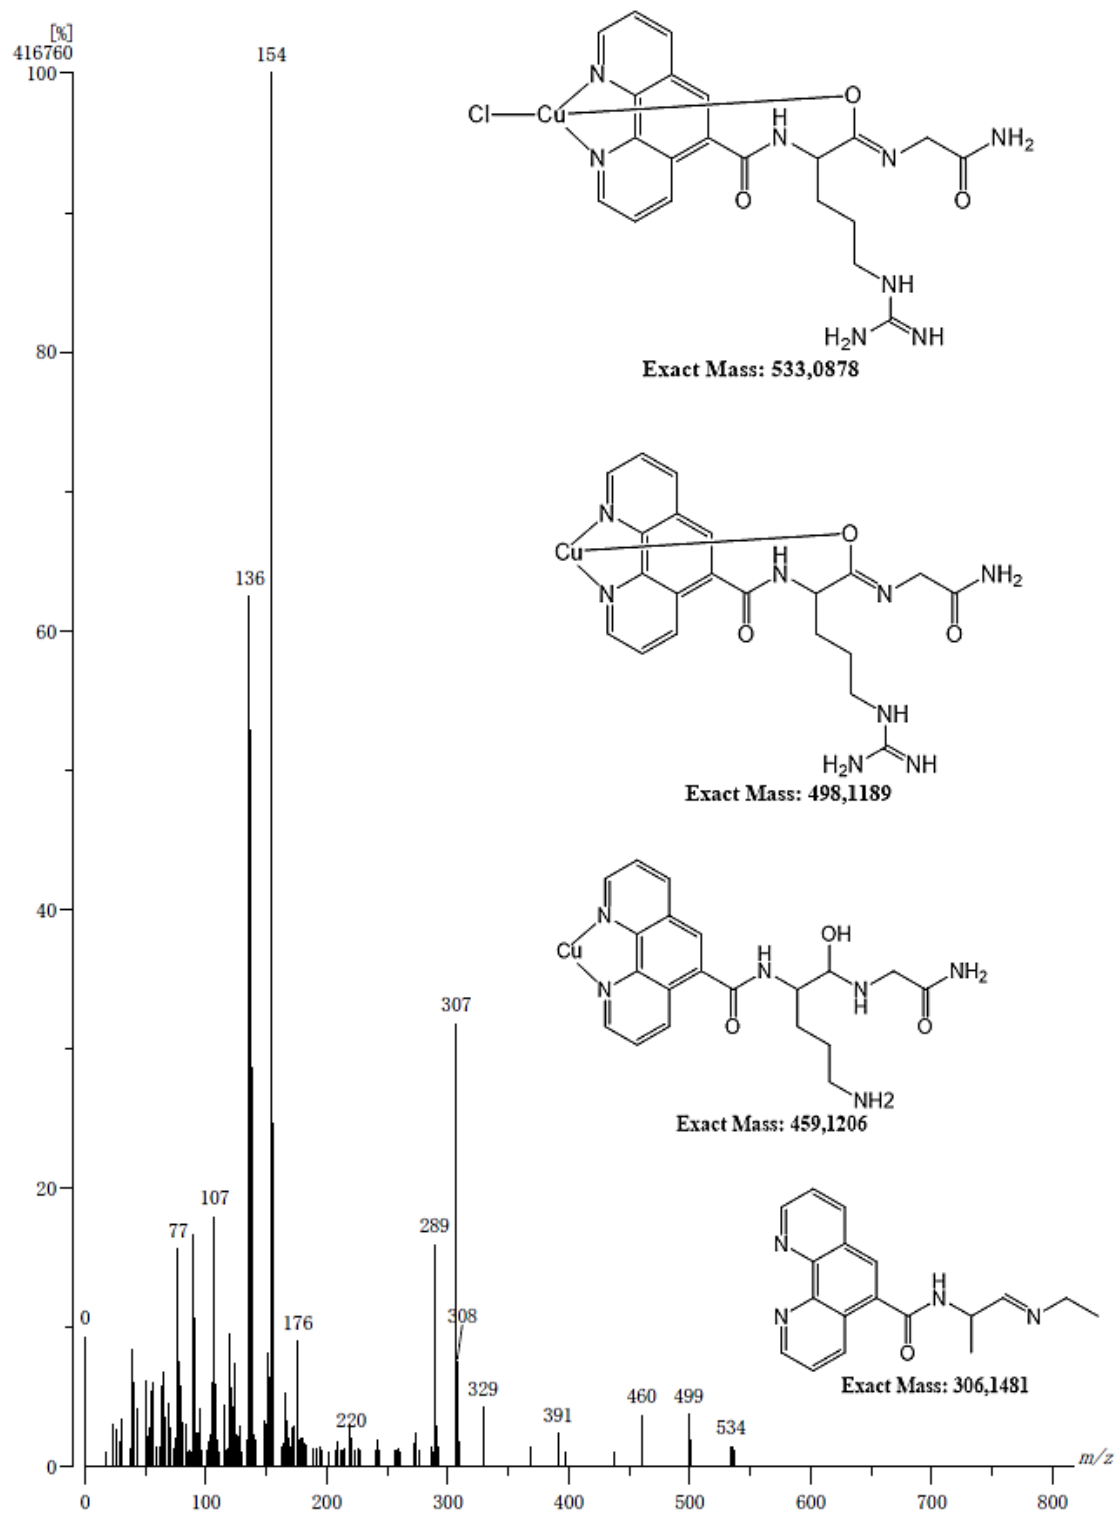

**Figure S7.** Mass spectra with ionization by FAB+ for Cu-PhenRG.

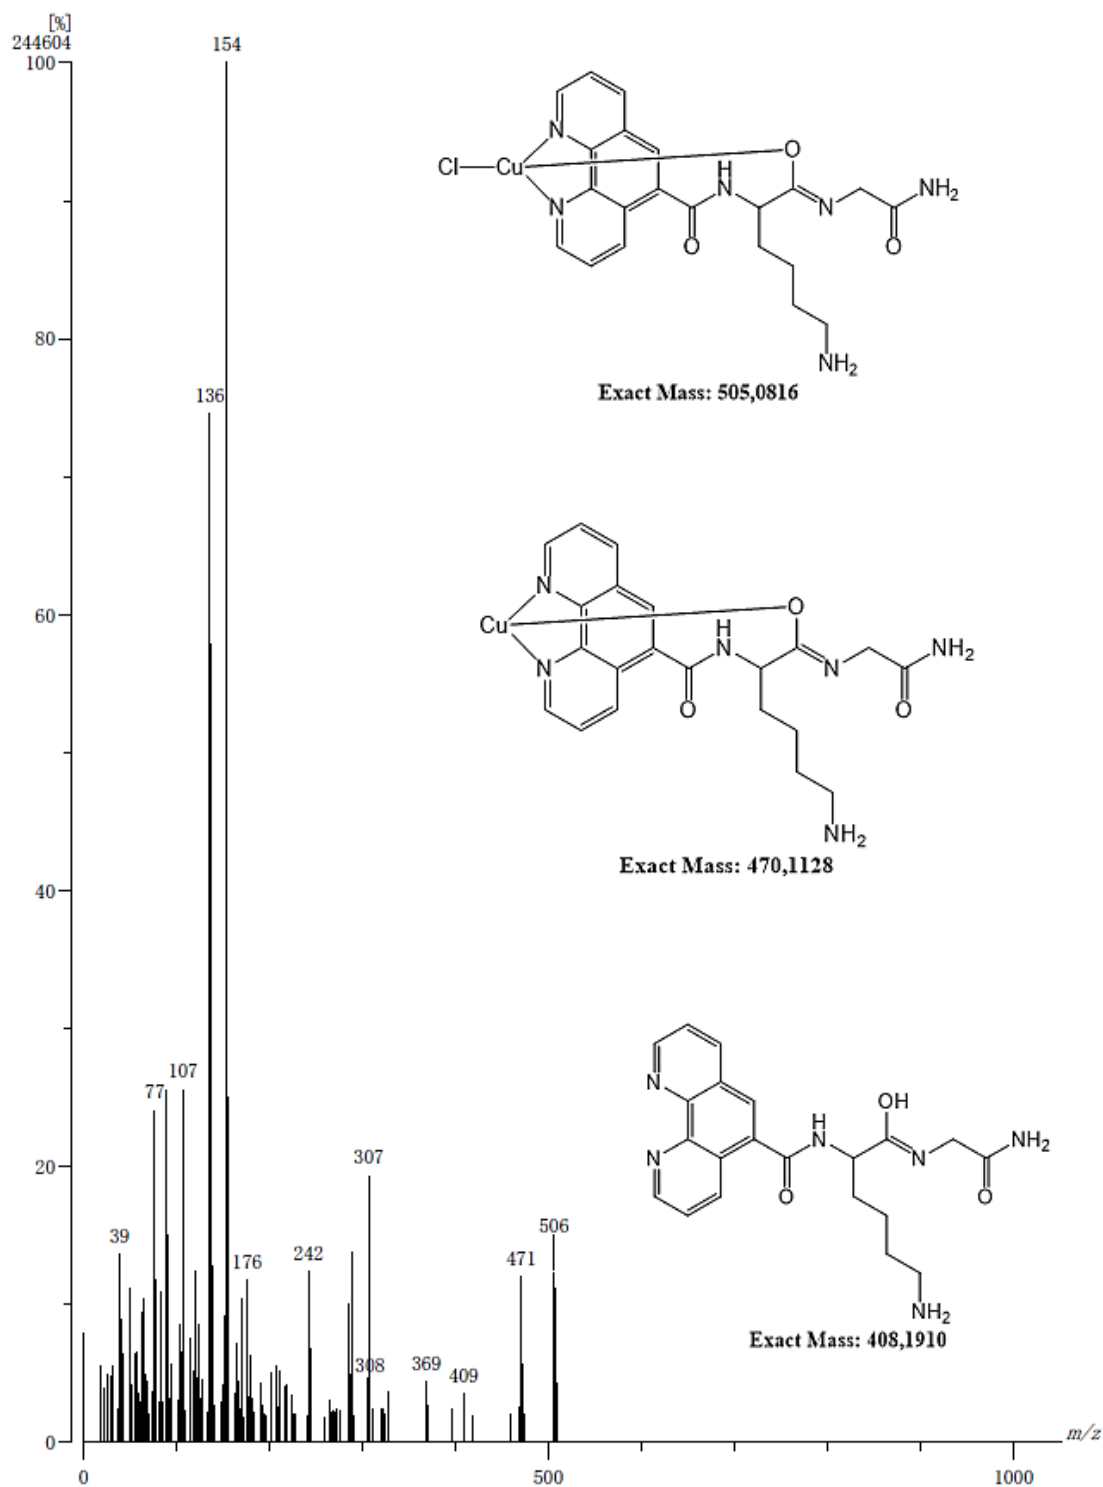

**Figure S8.** Mass spectra with ionization by FAB+ for Cu-PhenKG.
